# Supplementary material
Source: Research Square preprint supplement (doi:10.21203/rs.3.rs-10125758/v1)
Supplement: Supplementary file 1 [file e5cde0f428801c24ac33fbaa.docx]

**Digitally Mediated Romantic Relationships Among Italian Emerging Adults: a qualitative study**

**Luana Bruno¹ · Sara Torre² · Alejandro Iborra Cuéllar³ · Susanna Annese⁴ · Justyna Ratkowska-Pasikowska⁵ · Sławomir Pasikowski⁶ · Olga Maria Rosa Armigero⁷ · Maria Beatrice Ligorio⁸**

**Human Arenas**

**¹** Faculty of Education, Department of Research on Psychology and Education, Complutense University of Madrid, Madrid, Spain, <https://orcid.org/0000-0001-7052-7228>

**²** Department of Educational Sciences, Psychology, Communication, University of Bari, Bari, Italy, <https://orcid.org/0009-0001-7399-6692>

**³** Department of Educational Sciences, Area of Developmental and Educational Psychology, University of Alcalá, Alcalá, Spain, <https://orcid.org/0000-0001-8373-8622>

**⁴** Department of Educational Sciences, Psychology, Communication, University of Bari, Bari, Italy, <https://orcid.org/0000-0003-3296-9118>

**⁵** Department of Educational Studies, Faculty of Educational Science, University of Łódź, Łódź, Poland, <https://orcid.org/0000-0002-7318-3923>

**⁶** Department of Educational Studies, Faculty of Educational Science, University of Łódź, Łódź, Poland, <https://orcid.org/0000-0002-0768-1596>

**⁷** Department of Educational Sciences, Psychology, Communication, University of Bari, Bari, Italy, <https://orcid.org/0009-0001-8101-5508>, **corresponding author**: [o.armigero@alumni.uniba.it](mailto:o.armigero@alumni.uniba.it)

**⁸** Department of Educational Sciences, Psychology, Communication, University of Bari, Bari, Italy, <https://orcid.org/0000-0003-3028-5046>

# **Online Resource 1. The interview guide**

### **Introduction**

“The purpose of this interview is to better understand the role that social media plays in the everyday management of romantic relationships. The aim is not to judge or evaluate the quality of your relationship with your partner, but rather to understand how tools such as WhatsApp or similar platforms are used in the management of your relationship.”

### **Background Questions**

Age
Gender
Educational level / occupation

Relationship background
Are you currently in a romantic relationship?
If yes, how long have you been together?

If no, have you had other significant romantic relationships in the past?
If yes, what was the duration of your most significant relationship?

Social media use
 Which social media platforms do you use and how frequently?

### **Online Jealousy**

- What hypothetical behaviors of your partner on social media could trigger feelings of jealousy for you? Can you give concrete examples?
- If the participant does not mention specific behaviors or seems hesitant:
- For example, would you feel jealous if your partner posted provocative photos? How would that make you feel?
   Would you feel jealous if your partner kept photos with a former partner on their profile?
   Did similar situations occur in your past relationships?
- How would you feel if you realized that your partner was receiving messages from other girls/boys on social media?
   Has this ever happened in your current relationship or in previous relationships? If so, how did you feel?
- How would you feel about the possibility that your partner might start another relationship through social media?
   Has anything like this ever happened in your current relationship or in past relationships?
   If it happened, how do you think you would react?

### **Online Control**

- What behaviors do you engage in (or would you engage in) to monitor or control your partner on social media?
- If the participant does not answer or is hesitant:
- For example, creating a fake social media profile to monitor your partner or their friends.
- Did you engage in similar behaviors in previous relationships?
- What behaviors do you engage in (or would you engage in) to make your partner feel jealous on social media?
- If the participant does not answer or is hesitant:
- For example, posting a particular type of photo of yourself.
- If the participant answers positively, ask them to explain what they mean by “particular.”
- Did you engage in similar behaviors in previous relationships?
- What do you do to check how your partner uses social media?

If the participant does not answer or is hesitant:

For example, accessing your partner’s personal profile without their knowledge.

- Did you engage in these behaviors in previous relationships?

### **Online Communication**

- How does your online communication change when you are angry with your partner?
- If the participant does not answer or is hesitant, examples may include:
- Writing fewer messages
   Using capital letters
   Disappearing or not replying
   Giving short or abrupt responses
   Not using emojis
   Reading messages without replying
- How does your writing style change when you want your partner to ask what is wrong?

If the participant does not answer or is hesitant:

- For example, using specific punctuation or emojis.
   If so, ask for concrete examples of emojis used.
- When your partner takes longer than usual to reply, what do you usually think?
- Can you usually understand how your partner feels based on the way they write messages?

If the participant does not answer or is hesitant, ask for concrete examples.

- Did you behave in similar ways in previous relationships?

### **Online Intrusiveness**

- What do you usually do when your partner does not respond?
- If the participant does not answer or is hesitant:
- For example, sending multiple messages or calling repeatedly.
- What do you do when you are angry and your partner does not respond?
- After an argument, how does your communication through social media usually change?
- Have you ever checked your partner’s profile or timeline using the account of a mutual friend?
   Would you consider doing this?
- Compared to your past relationships, have there been any changes in these behaviors?

### **Online Intimacy**

- On average, how much time do you spend chatting with your partner?
- What emotions do you experience when online communication with your partner is constant?
   (for example well-being, closeness, intrusiveness)
- How do you express closeness and affection to your partner through online communication?
   (for example affectionate greetings, emojis, stickers)
- Did you behave in the same way in previous relationships?

### **Online Courtship**

- When you meet someone in person whom you like, what makes you decide to share your social media contacts with them?
- When you meet someone you like in person, what makes you decide to share your phone number?
- What attracts your attention when you look at boys’/girls’ social media profiles?
- What do you think about flirting with other people on social media while being in a relationship?
   Has this ever happened to you, either in your current relationship or in previous ones?
